# Supplementary figures and images for: Evolution of the WRKY Family in Angiosperms and Functional Diversity under Environmental Stress
Source: MDPI journal article supplement (doi:10.3390/ijms25063551), 2024-03-21

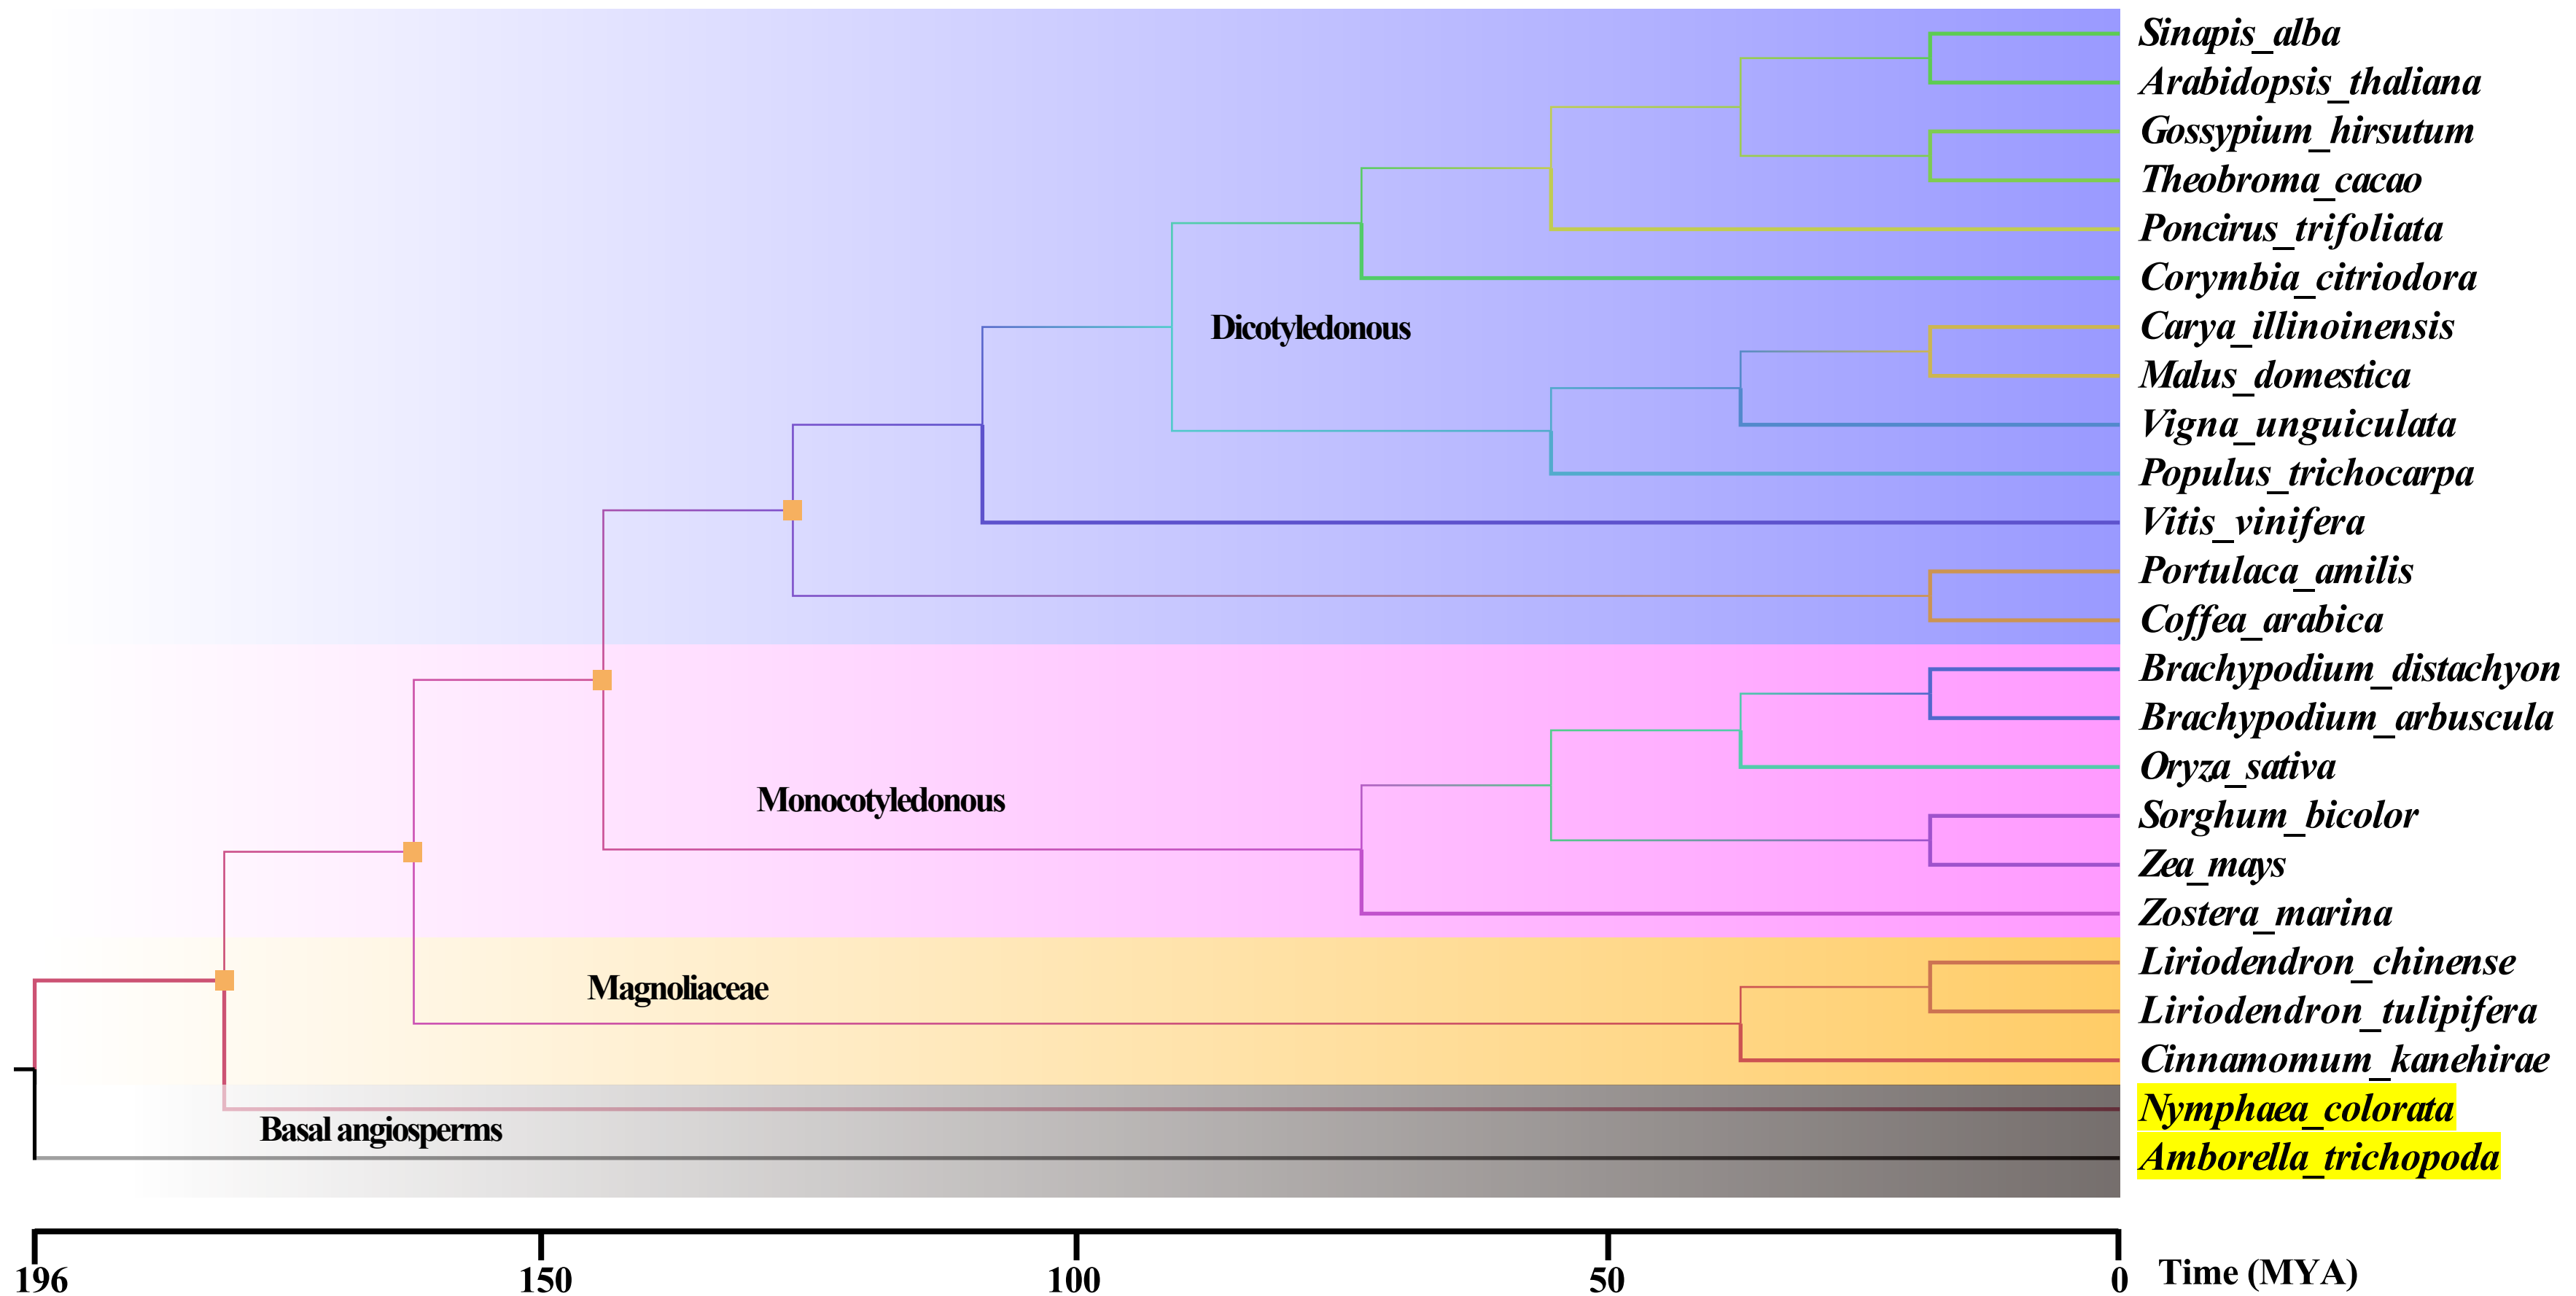

Supplement: s1 [file s1]
